# Supplementary material
Source: PubMed Central journal article supplement (PMC5369468)

**Risk Assessment in Acute Non-Variceal Upper GI Bleeding: The AIMS65 Score in Comparison to the Glasgow-Blatchford Score in a Scottish Population.**

**Online Supplementary Data**

**Explanatory table of diagnoses used for identifying patients**

| <b>International Classification of Disease 10 code</b> | <b>Diagnosis</b>                                                               |
|--------------------------------------------------------|--------------------------------------------------------------------------------|
|                                                        |                                                                                |
| K22.6                                                  | Gastro-oesophageal laceration<br>haemorrhage syndrome                          |
| K25.0                                                  | Gastric ulcer, acute with haemorrhage                                          |
| K25.2                                                  | Gastric ulcer, acute with both<br>haemorrhage and perforation                  |
| K25.4                                                  | Gastric ulcer, chronic or unspecified<br>with haemorrhage                      |
| K25.6                                                  | Gastric ulcer, chronic or unspecified<br>with both haemorrhage and perforation |
| K26.0                                                  | Duodenal ulcer, acute with<br>haemorrhage                                      |
| K26.2                                                  | Duodenal ulcer, acute with both<br>haemorrhage and perforation                 |

|       |                                                                                    |
|-------|------------------------------------------------------------------------------------|
| K26.4 | Duodenal ulcer, chronic or unspecified<br>with haemorrhage                         |
| K26.6 | Duodenal ulcer, chronic or unspecified<br>with haemorrhage and perforation         |
| K27.0 | Peptic ulcer, acute with haemorrhage                                               |
| K27.2 | Peptic ulcer, acute with both<br>haemorrhage and perforation                       |
| K27.4 | Peptic ulcer, chronic or unspecified with<br>haemorrhage                           |
| K27.6 | Peptic ulcer, chronic or unspecified with<br>haemorrhage and perforation           |
| K28.0 | Gastrojejunal ulcer, acute with<br>haemorrhage                                     |
| K28.2 | Gastrojejunal ulcer, acute with both<br>haemorrhage and perforation                |
| K28.4 | Gastrojejunal ulcer, chronic or<br>unspecified with haemorrhage                    |
| K28.6 | Gastrojejunal ulcer, chronic or<br>unspecified with haemorrhage and<br>perforation |
| K29.0 | Acute haemorrhagic gastritis                                                       |

|       |                                              |
|-------|----------------------------------------------|
| K92.0 | Hematemesis                                  |
| K92.1 | Melaena                                      |
| K92.2 | Gastrointestinal haemorrhage,<br>unspecified |

**Receiver-operating characteristic curves (ROC) for the AIMS65 score and Glasgow-Blatchford score (GBS) as predictors of requirement for endoscopic intervention.**

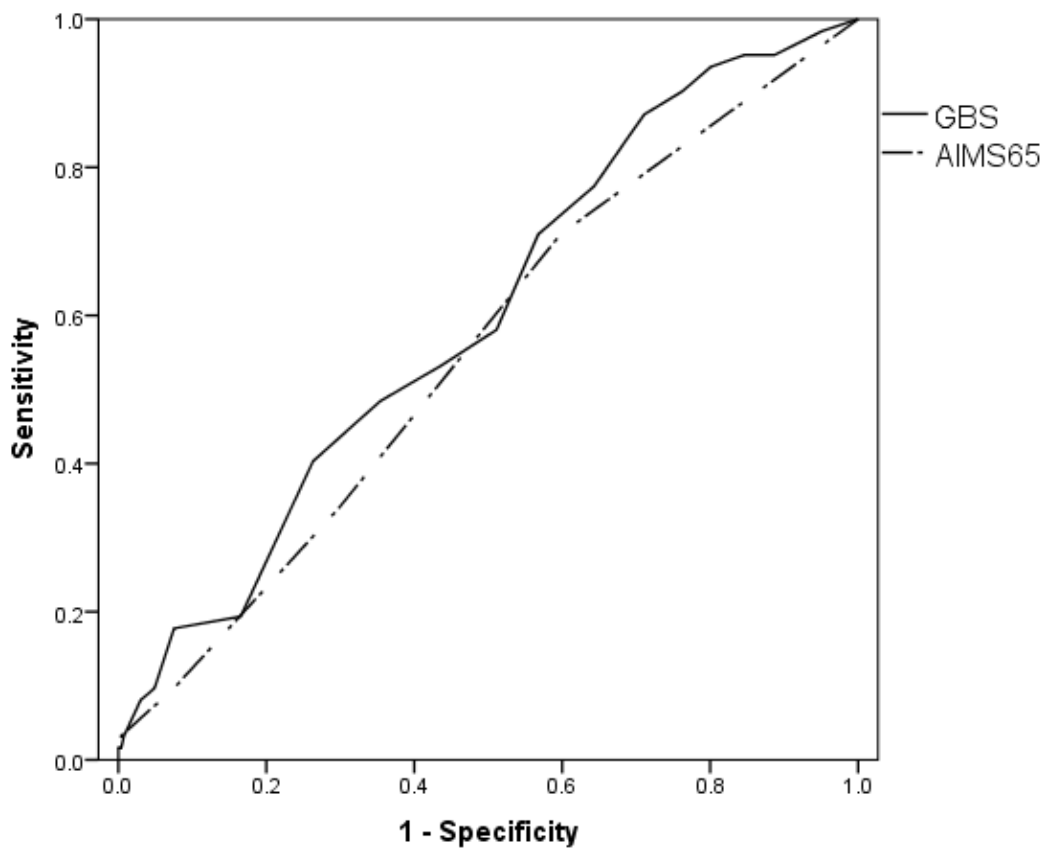

**ROC for the AIMS65 score and GBS as predictor of endoscopy refractory bleeding**

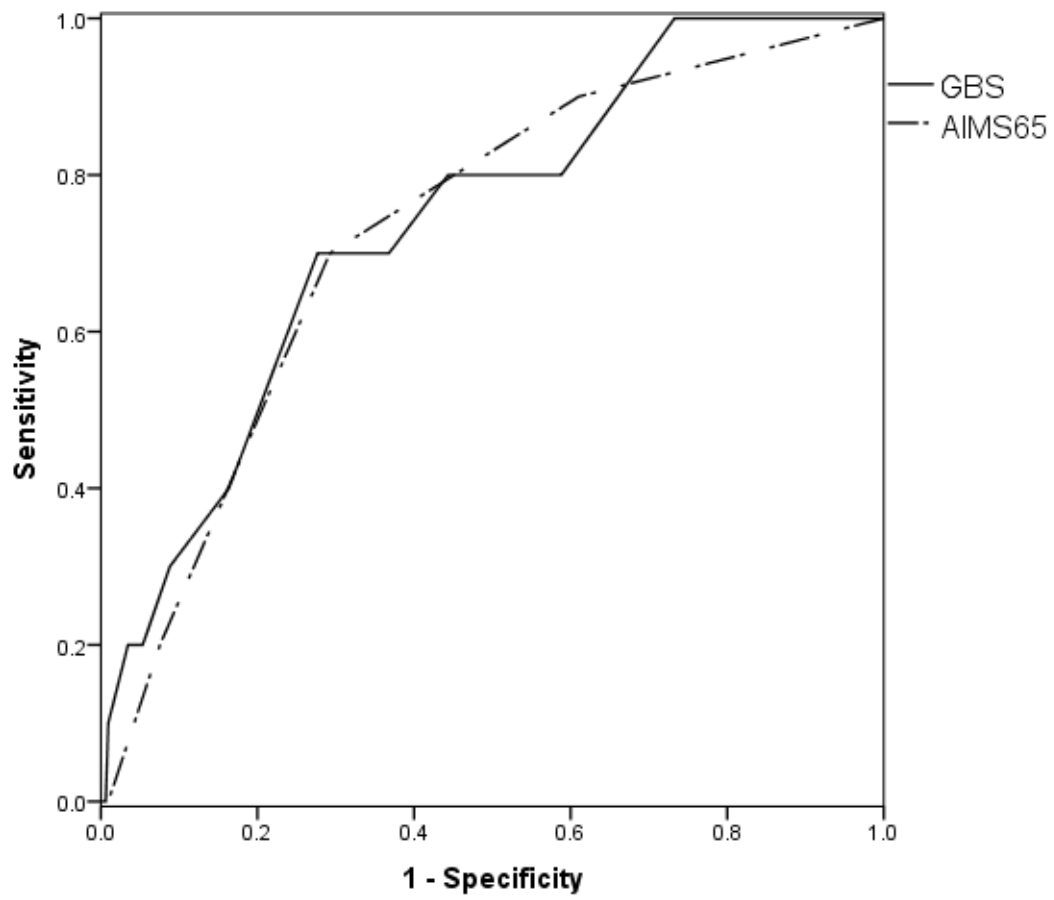

**ROC for the AIMS65 score and GBS as predictors of requirement for ICU.**

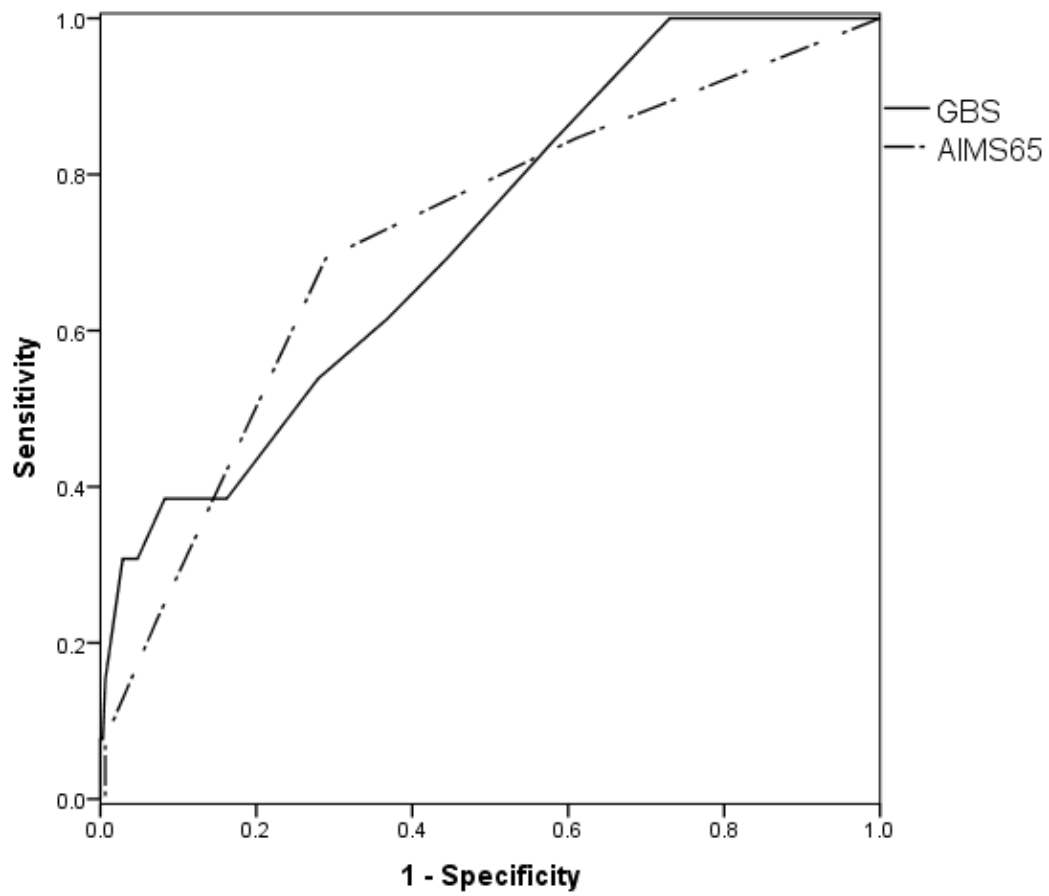

### ROC for the AIMS65 score and GBS as predictors of rebleeding

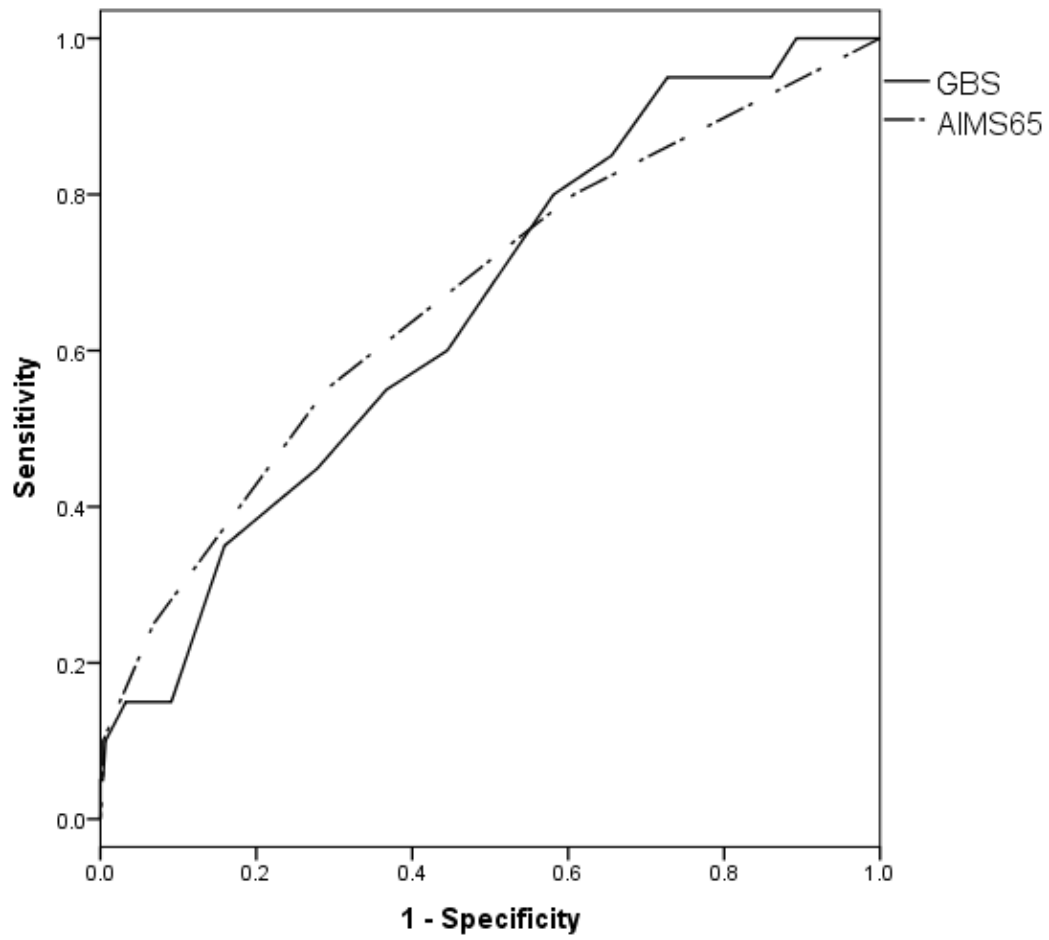

Supplement: flgastro-2015-100594-s1.pdf [file flgastro-2015-100594-s1.pdf]
